# Supplementary material for: A Phase Ib Expansion Cohort Evaluating Aurora A Kinase Inhibitor Alisertib and Dual TORC1/2 Inhibitor Sapanisertib in Patients with Advanced Solid Tumors
Source: MDPI journal article supplement (doi:10.3390/cancers16081456), 2024-04-10

Supplementary Table S1: Patient outcomes by tumor type across all cohorts

| Tumor Type                      | Number of Patients | Median Weeks on Treatment (Range) | Best response by RECIST Number (Percent) |                |                     |               | Reason for Study Discontinuation Number (Percent) |                      |            |                                 |                |
|---------------------------------|--------------------|-----------------------------------|------------------------------------------|----------------|---------------------|---------------|---------------------------------------------------|----------------------|------------|---------------------------------|----------------|
|                                 |                    |                                   | Partial Response                         | Stable Disease | Progressive Disease | Not Evaluable | Progression                                       | Clinical Progression | Toxicity   | Unrelated Medical Comorbidities | Patient Choice |
| Pancreatic Adenocarcinoma       | 14                 | 9.2 (4-47)                        | 0/14 (0%)                                | 5/14 (36%)     | 3/14 (21%)          | 6/14 (43%)    | 7/14 (50%)                                        | 3/14 (21%)           | 2/14 (14%) | 1/14 (7%)                       | 1/14 (7%)      |
| Breast Adenocarcinoma ER+/HER2- | 7                  | 8.9 (2-14.9)                      | 1/7 (14%)                                | 3/7 (43%)      | 2/7 (29%)           | 1/7 (14%)     | 3/7 (43%)                                         | 1/7 (14%)            | 3/7 (43%)  | 0/7 (0%)                        | 0/7 (0%)       |
| Breast Adenocarcinoma TNBC      | 2                  | 5.3 (3.6-7)                       | 0/2 (0%)                                 | 0/2 (0%)       | 1/2 (50%)           | 1/2 (50%)     | 1/2 (50%)                                         | 1/2 (50%)            | 0/2 (0%)   | 0/2 (0%)                        | 0/2 (0%)       |
| Colorectal Adenocarcinoma       | 4                  | 9.4 (4.9-12.7)                    | 0/4 (0%)                                 | 0/4 (0%)       | 4/4 (100%)          | 0/4 (0%)      | 4/4 (100%)                                        | 0/4 (0%)             | 0/4 (0%)   | 0/4 (0%)                        | 0/4 (0%)       |
| Ovarian Serous Carcinoma        | 2                  | 12.1 (11.1-13)                    | 0/2 (0%)                                 | 2/2 (100%)     | 0/2 (0%)            | 0/2 (0%)      | 2/2 (100%)                                        | 0/2 (0%)             | 0/2 (0%)   | 0/2 (0%)                        | 0/2 (0%)       |
| Renal Cell Carcinoma            | 1                  | 1.1 (N/A)                         | 0/1 (0%)                                 | 0/1 (0%)       | 0/1 (0%)            | 1/1 (100%)    | 0/1 (0%)                                          | 1/1 (100%)           | 0/1 (0%)   | 0/1 (0%)                        | 0/1 (0%)       |
| Uterine Serous Carcinoma        | 1                  | 10 (N/A)                          | 0/1 (0%)                                 | 0/1 (0%)       | 1/1 (100%)          | 0/1 (0%)      | 1/1 (100%)                                        | 0/1 (0%)             | 0/1 (0%)   | 0/1 (0%)                        | 0/1 (0%)       |

**Supplementary Table S2: Treatment-related adverse events attributed to one or both drugs occurring in at least 10% of patients across treatment groups**

|                       | Alisertib Lead-In<br>N=10<br>Patients A-1 through A-10 |           | Sapanisertib Lead-In<br>N=10<br>Patients S-1 through S-10 |           | Pancreatic Cancer<br>Expansion<br>N=11<br>Patients P-1 through P-11 |           | All Treatment Groups<br>N=31 |           |          |
|-----------------------|--------------------------------------------------------|-----------|-----------------------------------------------------------|-----------|---------------------------------------------------------------------|-----------|------------------------------|-----------|----------|
| Number (percent)      | Grade 1/2                                              | Grade 3/4 | Grade 1/2                                                 | Grade 3/4 | Grade 1/2                                                           | Grade 3/4 | Grade 1/2                    | Grade 3/4 | Total    |
| Fatigue               | 2                                                      | 1         | 4                                                         | 0         | 6                                                                   | 0         | 12 (39%)                     | 1 (3%)    | 13 (42%) |
| Mucositis             | 3                                                      | 2         | 2                                                         | 0         | 1                                                                   | 1         | 6 (19%)                      | 3 (10%)   | 9 (29%)  |
| Hyperglycemia         | 2                                                      | 1         | 2                                                         | 0         | 3                                                                   | 0         | 7 (23%)                      | 1 (3%)    | 8 (26%)  |
| Nausea                | 2                                                      | 0         | 1                                                         | 0         | 4                                                                   | 0         | 7 (23%)                      | 0         | 7 (23%)  |
| Neutropenia           | 0                                                      | 1         | 1                                                         | 0         | 0                                                                   | 3         | 1 (3%)                       | 4 (13%)   | 5 (16%)  |
| Thrombocytopenia      | 2                                                      | 0         | 1                                                         | 0         | 1                                                                   | 1         | 4 (13%)                      | 1 (3%)    | 5 (16%)  |
| Diarrhea              | 1                                                      | 0         | 1                                                         | 0         | 2                                                                   | 0         | 4 (13%)                      | 0         | 4 (13%)  |
| Cognitive disturbance | 0                                                      | 0         | 1                                                         | 0         | 2                                                                   | 0         | 3 (10%)                      | 0         | 3 (10%)  |
| Vomiting              | 1                                                      | 0         | 0                                                         | 0         | 2                                                                   | 0         | 3 (10%)                      | 0         | 3 (10%)  |
| Anorexia              | 1                                                      | 0         | 0                                                         | 0         | 2                                                                   | 0         | 3 (10%)                      | 0         | 3 (10%)  |
| Alopecia              | 3                                                      | 0         | 0                                                         | 0         | 0                                                                   | 0         | 3 (10%)                      | 0         | 3 (10%)  |

Supplementary Figure S1

Patient A-4

Baseline C1D7 C2D7

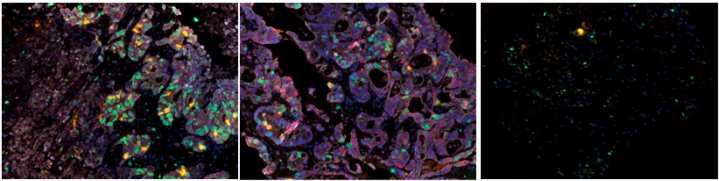

CK=White, pHH3=Yellow, Ki67=Green, p53=Red

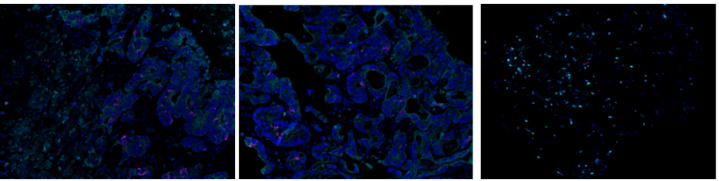

Cyclin B1= Magenta, p21=Cyan

Patient A-9

Baseline C1D7 C2D7

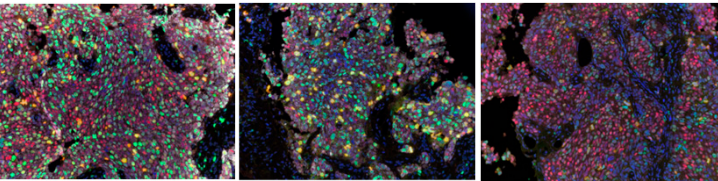

CK=White, pHH3=Yellow, Ki67=Green, p53=Red

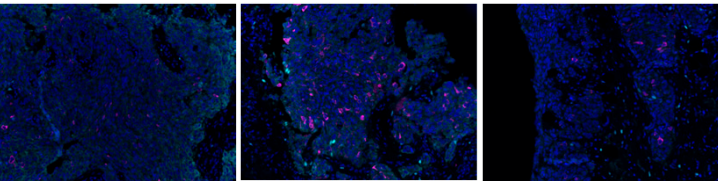

Cyclin B1= Magenta, p21=Cyan

Patient A-2

Baseline C1D7 C2D7

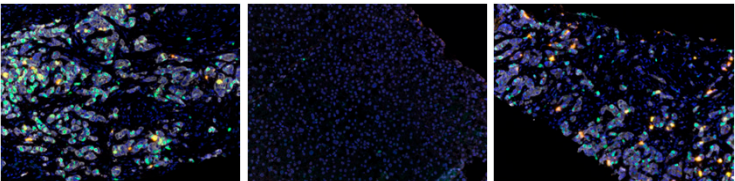

CK=White, pHH3=Yellow, Ki67=Green, p53=Red

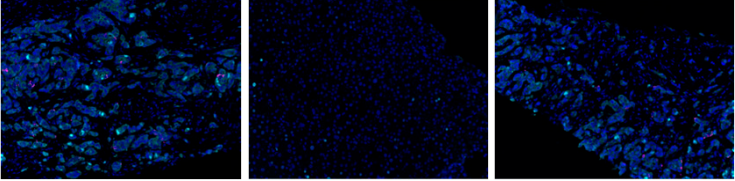

Cyclin B1= Magenta, p21=Cyan

Patient S-2

Baseline C1D7 C2D7

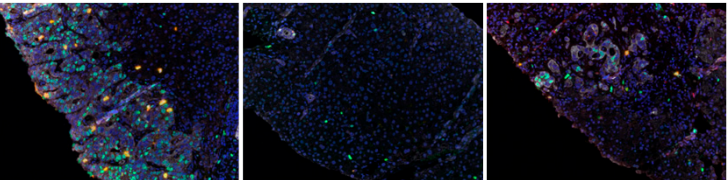

CK=White, pHH3=Yellow, Ki67=Green, p53=Red

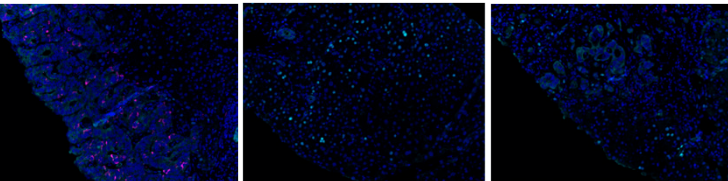

Cyclin B1= Magenta, p21=Cyan

Patient S-5

Baseline C1D7 C2D7

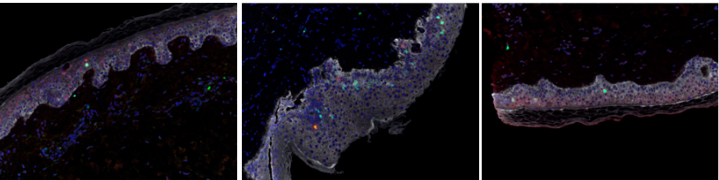

CK=White, pHH3=Yellow, Ki67=Green, p53=Red

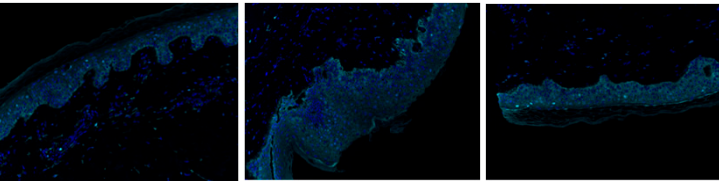

Cyclin B1= Magenta, p21=Cyan

Patient S-4

Baseline C1D7 C2D7

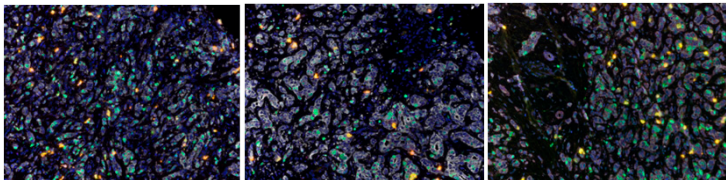

CK=White, pHH3=Yellow, Ki67=Green, p53=Red

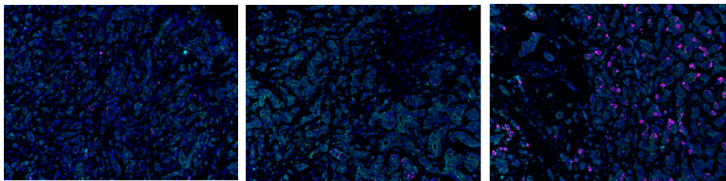

Cyclin B1= Magenta, p21=Cyan

Supplementary Figure S2

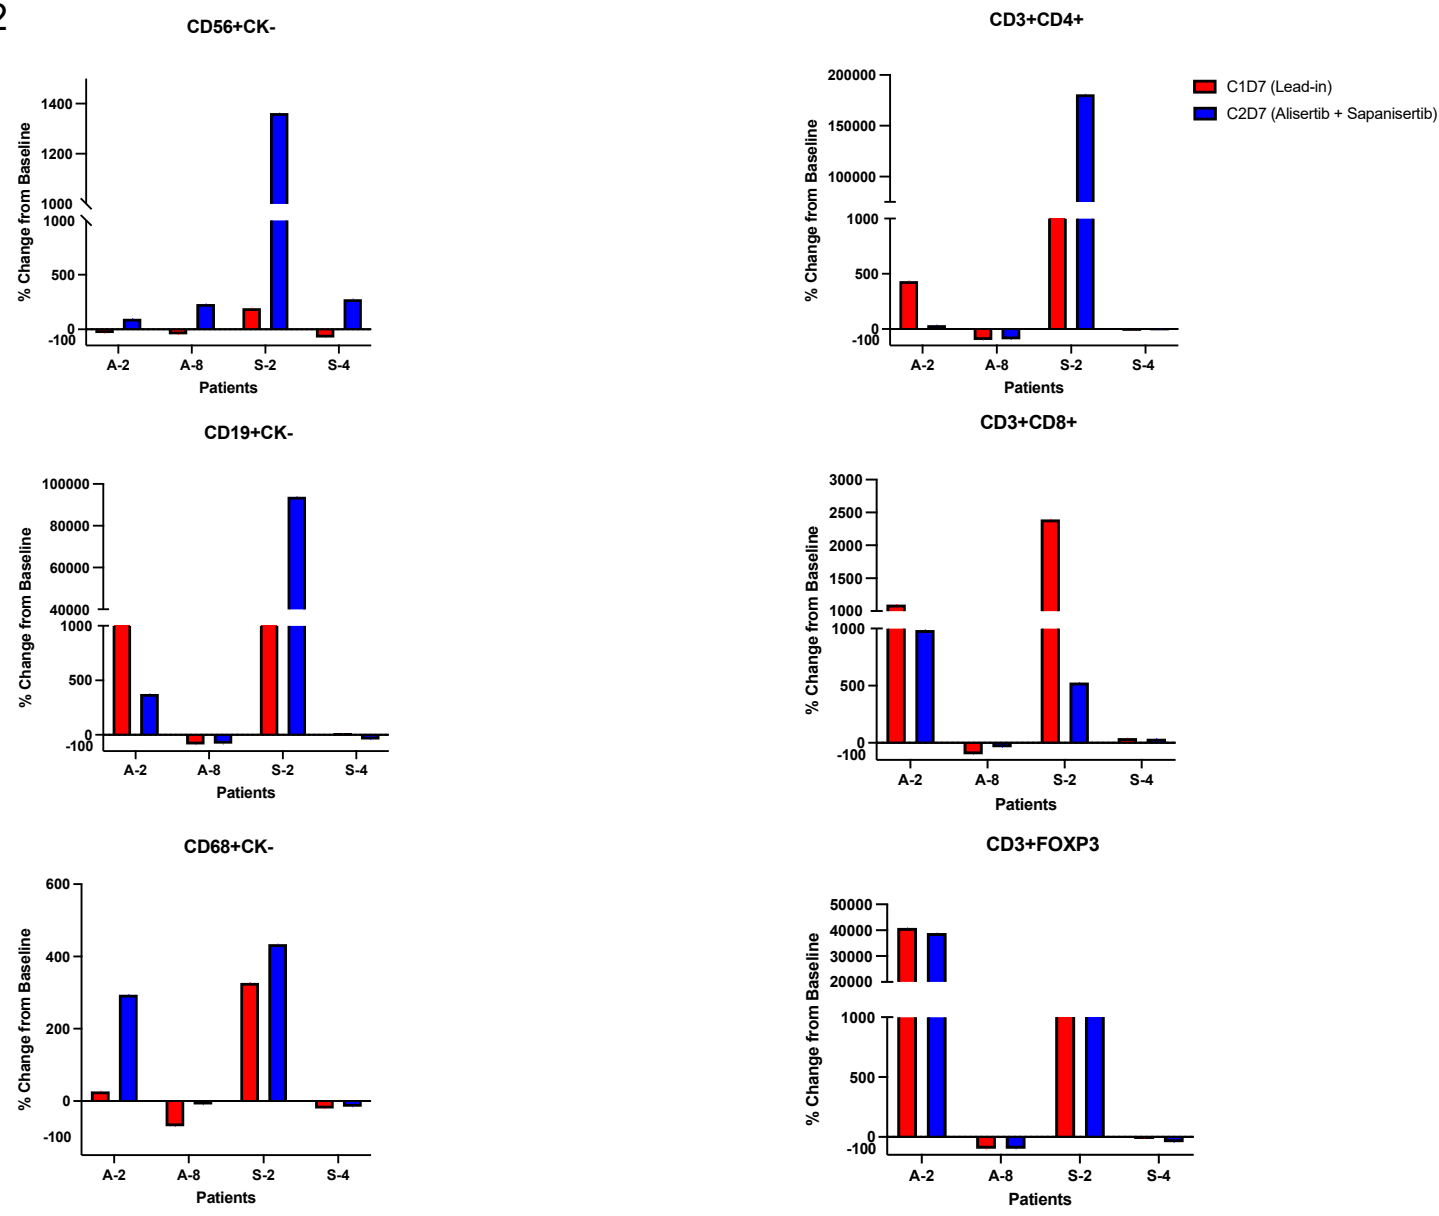

Supplement: s1 [file s1]
